# Supplementary material for: Shell variability in the stem turtles Proterochersis spp.
Source: PeerJ journal article supplement (doi:10.7717/peerj.6134), 2018-12-21
Supplement: Article_S2.pdf [file Article_S2.pdf]

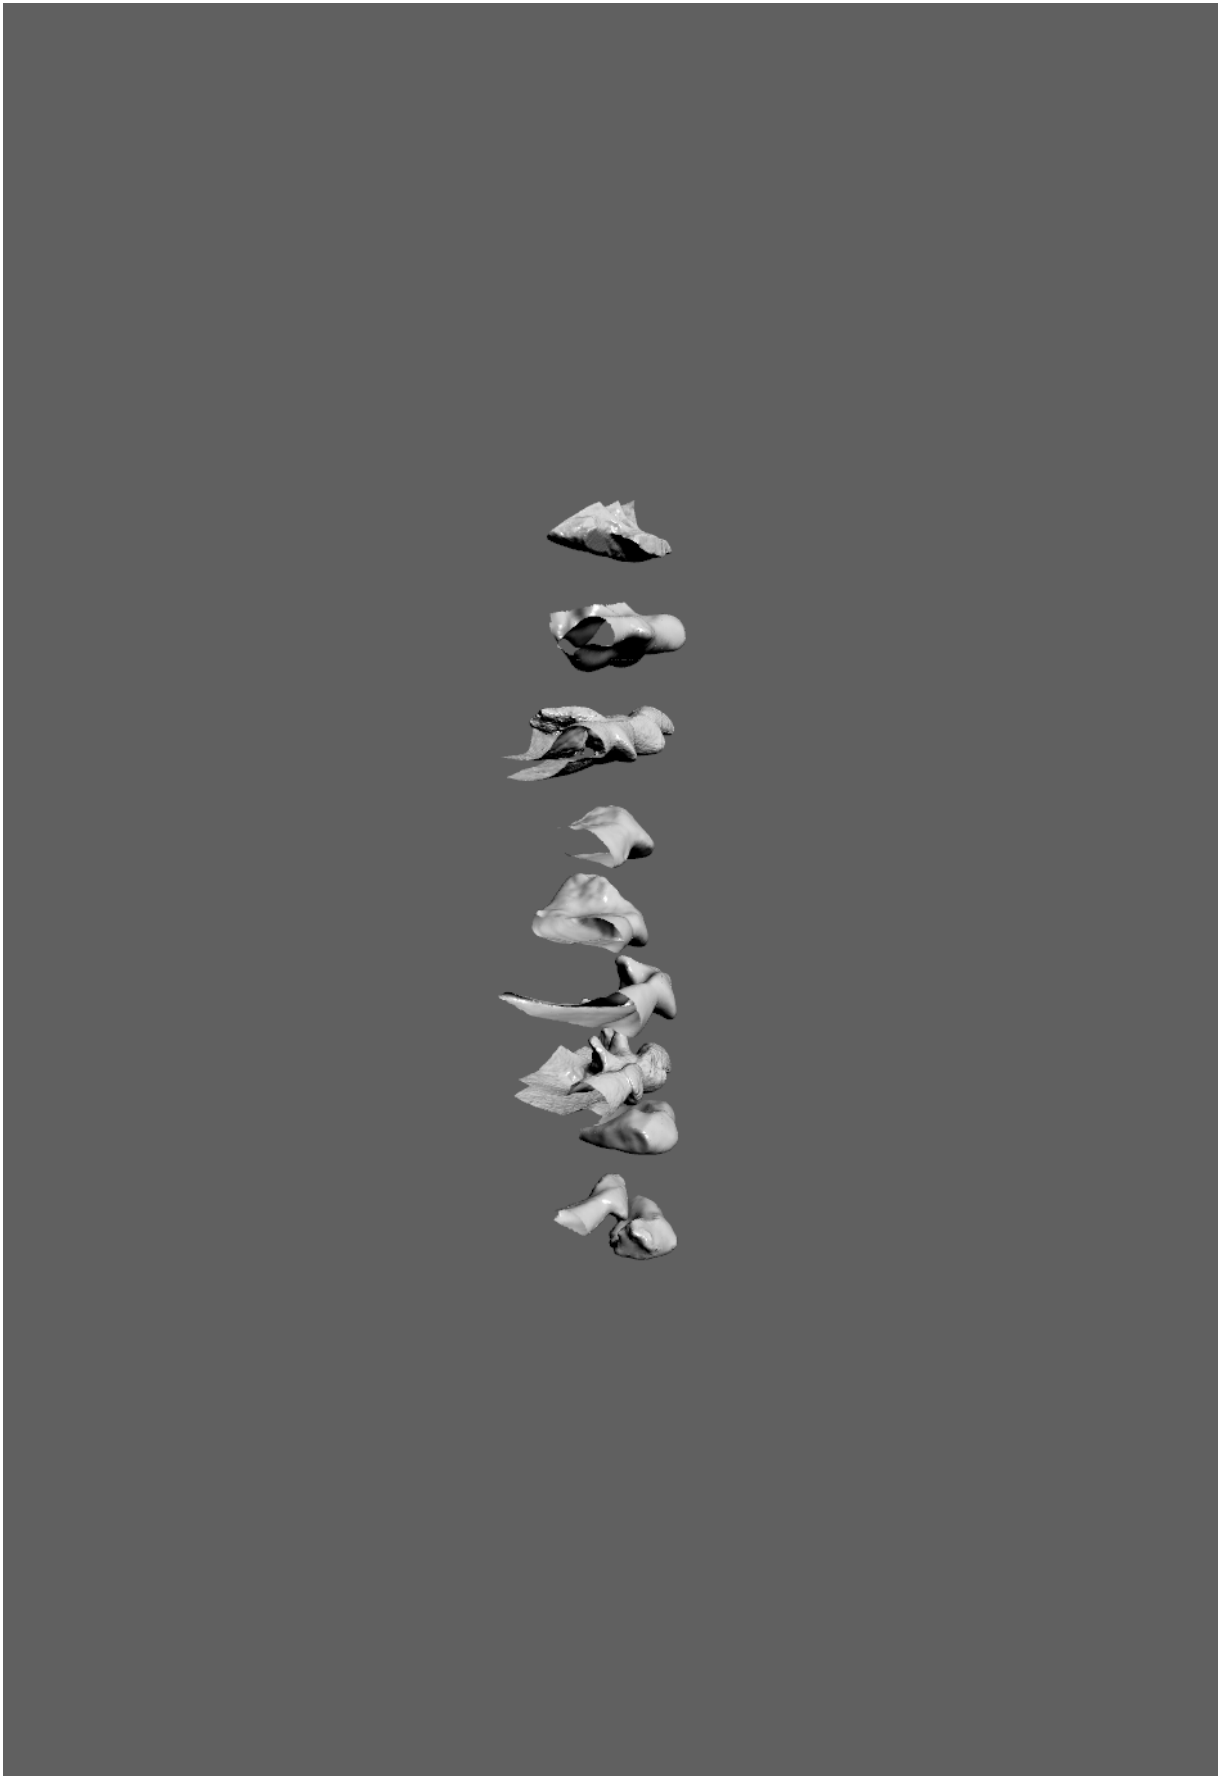

**Article S2.** Models of anterior regions of the turtle shells of *Proterochersis porebensis*, with sectioned extragulars.
